# Supplementary material for: Multi-modal transcriptomics: integrating machine learning and convolutional neural networks to identify immune biomarkers in atherosclerosis
Source: Front Cardiovasc Med. 2024 Nov 26;11:1397407. doi: 10.3389/fcvm.2024.1397407 (PMC11628520; doi:10.3389/fcvm.2024.1397407)
Supplement: Supplementary Table S1 [file Table1.xlsx]

## Sheet: classif.log_reg
row_ids

## Sheet: classif.lda
row_ids

## Sheet: classif.naive_bayes
row_ids

## Sheet: classif.kknn
row_ids

## Sheet: classif.rpart
row_ids
